# Supplementary material
Source: bioRxiv or medRxiv preprint supplement (https://www.biorxiv.org/highwire/filestream/117954/field_highwire_adjunct_files/0/299800-1.pdf)
Supplement: Supplementary file [file 299800-1.pdf]

**Supplementary Table 1**

Worker and royal jellies RNA-seq read counts after trimming and QC.

| <b>Sample name</b> | <b>Sample type</b> | <b># of reads</b> |
|--------------------|--------------------|-------------------|
| RJ-YAGL-U_S2       | Royal jelly        | 28,552,147        |
| RJ-YAEL-E_S4       | Royal jelly        | 54,236,333        |
| RJ-John-g-J_S2     | Royal jelly        | 45,785,408        |
| WJ-John-3-L_S5     | Worker jelly       | 60,634,302        |
| WJ-John-586-TAP_S1 | Worker jelly       | 63,507,991        |
| WJ-John-H-K_S3     | Worker jelly       | 58,536,298        |
